# Supplementary material
Source: ML conference proceedings conference paper supplement (https://aclanthology.org/D18-1287)
Supplement: Attachment [file D18-1287.Attachment.zip]

## A Tasks and Data: Comparisons

Table 7 provides summary statistics comparing LANI and CHAI to existing related resources.

## B Reward Function

**LANI** Following Misra et al. (2017), we use a shaped reward function that rewards the agent for moving towards the goal location. The reward for example  $i$  is:

$$R^{(i)}(s, a, s') = R_p^{(i)} + \phi^{(i)}(s) - \phi^{(i)}(s') \quad (1)$$

where  $s'$  is the origin state,  $a$  is the action,  $s$  is the target state,  $R_p^{(i)}$  is the problem reward, and  $\phi^{(i)}(s) - \phi^{(i)}(s')$  is a shaping term. We use a potential-based shaping (Ng et al., 1999) that encourages the agent to both move and turn towards the goal. The potential function is:

$$\begin{aligned} \phi^{(i)}(s) = & \delta \text{TURNDIST}(s, s_g^{(i)}) \\ & + (1 - \delta) \text{MOVEDIST}(s, s_g^{(i)}) , \end{aligned}$$

where  $\text{MOVEDIST}$  is the euclidean distance to the goal normalized by the agent’s forward movement distance, and  $\text{TURNDIST}$  is the angle the agent needs to turn to face the goal normalized by the agent’s turn angle. We use  $\delta$  as a gating term, which is 0 when the agent is near the goal and increases monotonically towards 1 the further the agent is from the goal. This decreases the sensitivity of the potential function to the  $\text{TURNDIST}$  term close to the goal. The problem reward  $R_p^{(i)}$  provides a negative reward of up to -1 on collision with any object or boundary (based on the angle and magnitude of collision), a negative reward of -0.005 on every action to discourage long trajectories, a negative reward of -1 on an unsuccessful stop, when the distance to the goal location is greater than 5, and a positive reward of +1 on a successful stop.

**CHAI** We use a similar potential based reward function as LANI. Instead of rewarding the agent to move towards the final goal the model is rewarded for moving towards the next intermediate goal. We heuristically generate intermediate goals from the human demonstration by generating goals for objects to be interacted with, doors that the agent should enter, and the final position of the agent. The potential function is:

$$\begin{aligned} \phi^{(i)}(s) = & \text{TURNDIST}(s, s_{g,j}^{(i)}) + \\ & \text{MOVEDIST}(s, s_{g,j}^{(i)}) + \text{INTDIST}(s, s_{g,j}^{(i)}) , \end{aligned}$$

where  $s_{g,j}^{(i)}$  is the next intermediate goal,  $\text{TURNDIST}$  rewards the agent for turning to-

wards the goal,  $\text{MOVEDIST}$  rewards the agent for moving closer to the goal, and  $\text{INTDIST}$  rewards the agent for accomplishing the interaction in the intermediate goal. The goal is updated on being accomplished. Besides the potential term, we use a problem reward  $R_p^{(i)}$  that gives a reward of 1 for stopping near a goal, -1 for colliding with obstacles, and -0.002 as a verbosity penalty for each step.

## C Baseline Details

**MISRA17** We use the model of Misra et al. (2017). The model uses a convolution neural network for encoding the visual observations, a recurrent neural network with LSTM units to encode the instruction, and a feed-forward network to generate actions using these encodings. The model is trained using policy gradient in a contextual bandit setting. We use the code provided by the authors.

**CHAPLOT18** We use the gated attention architecture of Chaplot et al. (2018). The model is trained using policy gradient with generalized advantage estimation (Schulman et al., 2015). We use the code provided by the authors.

**Our Approach with Joint Training** We train the full model with policy gradient. We maximize the expected reward objective with entropy regularization. Given a sampled goal location  $l_g \sim p(\cdot \mid \bar{x}, \mathbf{I}_P)$  and a sampled action  $a \sim p(\cdot \mid l_g, (\mathbf{I}_1, p_1), \dots, (\mathbf{I}_t, p_t))$ , the update is:

$$\begin{aligned} \nabla J \approx & \{ \nabla \log P(l_g \mid \bar{x}, \mathbf{I}_P) + \\ & \nabla \log P(a_t \mid l_g, (\mathbf{I}_1, p_1), \dots, (\mathbf{I}_t, p_t)) \} R(s_t, a) \\ & \lambda \nabla H(\pi(\cdot \mid \tilde{s}_t)) . \end{aligned}$$

We perform joint training with randomly initialized goal prediction and action generation models.

## D Hyperparameters

For LANI experiments, we use 5% of the training data for tuning the hyperparameters and train on the remaining. For CHAI, we use the development set for tuning the hyperparameters. We train our models for 20 epochs and find the optimal stopping epoch using the tuning set. We use 32 dimensional embeddings for words and time.  $\text{LSTM}_x$  and  $\text{LSTM}_A$  are single layer LSTMs with 256 hidden units. The first layer of  $\text{CNN}_0$  contains 128  $8 \times 8$  kernels with a stride of 4 and padding 3, and the second layer contains 64  $3 \times 3$  kernels with a stride of 1 and padding 1. The convolution layers in LINGUNET use 32  $5 \times 5$  kernels with stride

| Dataset                 | Num Instructions | Vocabulary Size | Mean Instruction Length | Num. Actions | Avg Trajectory Length | Partially Observed |
|-------------------------|------------------|-----------------|-------------------------|--------------|-----------------------|--------------------|
| Bisk et al. (2016)      | 16,767           | 1,426           | 15.27                   | 81           | 15.4                  | No                 |
| MacMahon et al. (2006)  | 3,237            | 563             | 7.96                    | 3            | 3.12                  | Yes                |
| Matuszek et al. (2012b) | 217              | 39              | 6.65                    | 3            | N/A                   | No                 |
| Misra et al. (2015)     | 469              | 775             | 48.7                    | >100         | 21.5                  | No                 |
| LANI                    | 28,204           | 2,292           | 12.07                   | 4            | 24.6                  | Yes                |
| CHAI                    | 13,729           | 1018            | 10.14                   | 1028         | 54.5                  | Yes                |

Table 7: Comparison of LANI and CHAI to several existing natural language instructions corpora.

| Category              | Present | Absent | <i>p</i> -value |
|-----------------------|---------|--------|-----------------|
| Spatial relations     | 2.56    | 1.77   | .023            |
| Location conjunction  | 3.85    | 1.93   | .226            |
| Temporal coordination | 1.70    | 2.14   | .164            |
| Co-reference          | 1.98    | 1.98   | .993            |

Table 8: Mean goal prediction error for CHAI instructions with and without the analysis categories we used in Table 2. The *p*-values are from two-sided *t*-tests comparing the means in each row.

2. All deconvolutions except the final one, also use  $32 \times 5 \times 5$  kernels with stride 2. The dropout probability in LINGUNET is 0.5. The size of attention mask is  $32 \times 32 + 1$ . For both LANI and CHAI, we use a camera angle of  $60^\circ$  and create panoramas using 6 separate RGB images. Each image is of size  $128 \times 128$ . We use a learning rate of 0.00025 and entropy coefficient  $\lambda$  of 0.05.

## E CHAI Error Analysis

Table 8 provides the same kind of error analysis results here for the CHAI dataset as we produced for LANI, comparing performance of the model on samples of sentences with and without the analysis phenomena that occurred in CHAI.

## F Examples of Generated Goal Prediction

Figure 7 shows example goal predictions from the development sets. We found the predicted probability distributions to be reasonable even in many cases where the agent failed to successfully complete the task. We observed that often the evaluation metric is too strict for LANI instructions, especially in cases of instruction ambiguity.

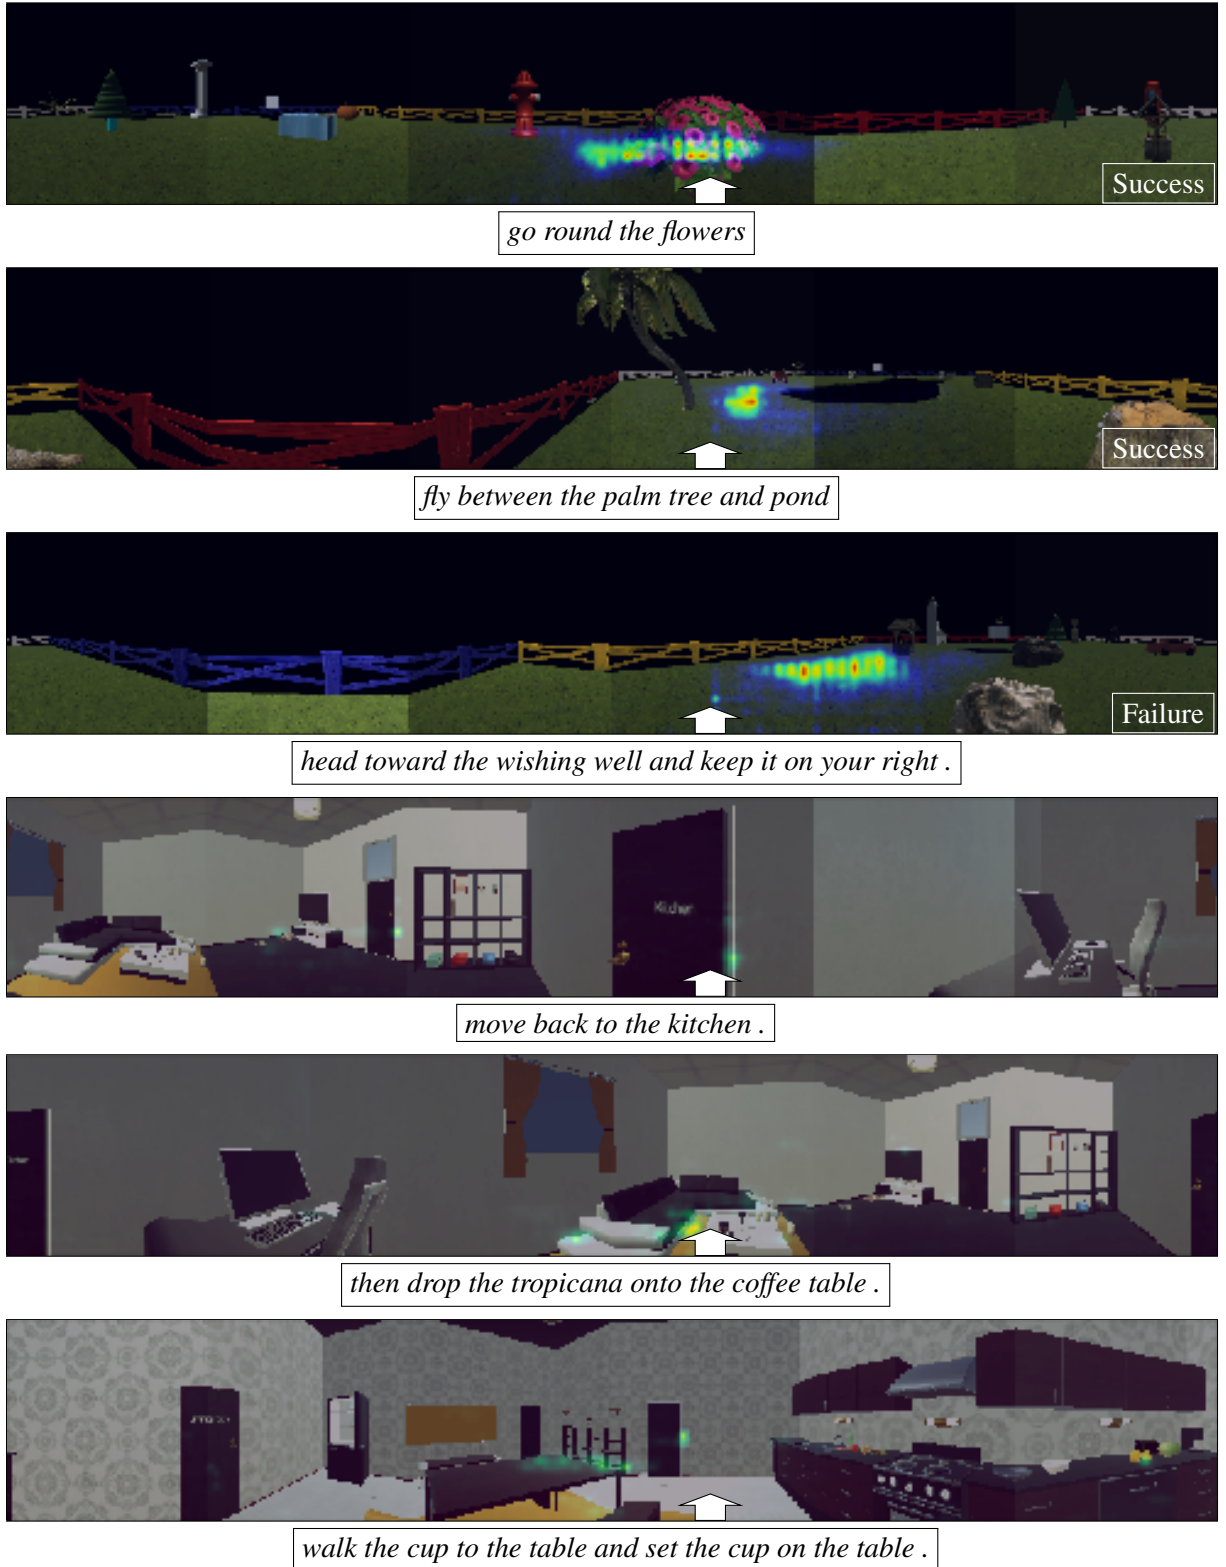

Figure 7: Goal prediction probability maps  $P_g$  overlaid on the corresponding observed panoramas  $I_P$ . The top three examples show results from LANI, the bottom three from CHAI. The white arrow indicates the forward direction that the agent is facing. The success/failure in the LANI examples indicate if the task was completed accurately or not following the task completion (TC) metric.
