# Supplementary material
Source: ML conference proceedings conference paper supplement (https://aclanthology.org/D18-1287)
Supplement: Attachment [file D18-1287.Attachment.zip]

Archive with 3 entries (2 files):
- instruction-emnlp-2018-camera-ready-appendix.pdf
- __MACOSX/
- __MACOSX/._instruction-emnlp-2018-camera-ready-appendix.pdf
